# Supplementary material
Source: PubMed Central journal article supplement (PMC11010606)
Supplement: mmc1.pdf [file mmc1.pdf]

# **Capacity for the management of kidney failure in the International Society of Nephrology North America and the Caribbean region: Report from the 2023 ISN Global Kidney Health Atlas (ISN-GKHA)**

## **Supplementary Tables and Figures**

**Table S1.** Burden of CKD in the ISN North America and the Caribbean region.

**Table S2.** Risk factors for CKD in the ISN North America and the Caribbean region.

**Figure S1.** Quality of dialysis and transplantation: Proportion of centers routinely measuring and reporting outcomes (A) and proportion of people initiating dialysis with an incremental start (B) in the ISN North America and the Caribbean region.

**Figure S2.** Within-country variation in the organization, delivery, and cost of kidney failure care and access to KRT in the ISN North America and the Caribbean region.

**Figure S3.** Availability of services for CKD monitoring and management (proportion of countries) at the primary and secondary/tertiary care level in the ISN North America and the Caribbean region.

**Figure S4.** Proportion of death and hospitalization in people living with kidney failure on dialysis in the first year of dialysis, globally and in the ISN North America and the Caribbean region.

**Figure S5.** Availability and basis of participation of 'official' registries for conditions and treatments (proportion of countries) in the ISN North America and the Caribbean region.

**Figure S6.** Proportion of countries in which kidney disease is recognized as a health priority by the government in the ISN North America and the Caribbean region.

**Table S1.** Burden of CKD in the ISN North America and the Caribbean region.<sup>16,17</sup>

| Country                        | CKD Prevalence<br>% (95% CI) | Death attributed to CKD<br>% (95% CI) | DALYs attributed to CKD<br>per 100,000<br>% (95% CI) | Medical doctor<br>prevalence (per 1000<br>population) | Specialist Physician<br>prevalence (per 1000<br>population) | Nurse prevalence<br>(per 1000<br>population) |
|--------------------------------|------------------------------|---------------------------------------|------------------------------------------------------|-------------------------------------------------------|-------------------------------------------------------------|----------------------------------------------|
| <b>Global [median (IQR)]</b>   | <b>9.54 (5.87-11.73)</b>     | <b>2.44 (1.58-3.88)</b>               | <b>491.35 (359.92-635.99)</b>                        | <b>17.7 (3.8-32.8)</b>                                | <b>1.9 (0.42-3.0)</b>                                       | <b>36.2 (14.4-66.6)</b>                      |
| <b>NAC [median (IQR)]</b>      | <b>11.36 (10.51-11.73)</b>   | <b>4.77 (4.11-5.25)</b>               | <b>1169.71 (979.02-1221.53)</b>                      | <b>24.4 (9.4-27.7)</b>                                | <b>2.3 (1.3-2.7)</b>                                        | <b>45.7 (40.7-90.8)</b>                      |
| Antigua and Barbuda            | 12.37 (11.35 - 13.62)        | 5.96 (5.4 - 6.55)                     | 1169.71 (1001.34 - 1350.99)                          | 27.67                                                 | 2.96                                                        | 90.83                                        |
| Aruba                          | -                            | -                                     | -                                                    | -                                                     | -                                                           | -                                            |
| Bahamas                        | 9.82 (9.17 - 10.47)          | 4.11 (3.81 - 4.42)                    | 1002.39 (835.44 - 1206.05)                           | 19.39                                                 | 2.01                                                        | 45.67                                        |
| Barbados                       | -                            | -                                     | -                                                    | -                                                     | -                                                           | -                                            |
| Bermuda                        | -                            | -                                     | -                                                    | -                                                     | -                                                           | -                                            |
| Canada                         | 10.87 (10.10 - 11.64)        | 2.6 (2.22 - 2.91)                     | 373.20 (329.91 - 418.22)                             | 24.43                                                 | 2.31                                                        | 110.70                                       |
| Jamaica                        | 9.78 (9.15 - 10.39)          | 4.77 (4.36 - 5.13)                    | 979.02 (798.40 - 1196.37)                            | 5.27                                                  | 1.31                                                        | 9.43                                         |
| St. Lucia                      | 11.36 (10.59 - 12.12)        | 5.08 (4.59 - 5.54)                    | 1200.36 (1028.80 - 1401.66)                          | 6.41                                                  | 0.64                                                        | 31.55                                        |
| St. Vincent and the Grenadines | 10.51 (9.81 - 11.17)         | 4.52 (4.16 - 4.89)                    | 1221.53 (1055.87 - 1410.65)                          | 9.41                                                  | 0.66                                                        | 70.15                                        |
| Trinidad and Tobago            | 11.73 (10.95 - 12.54)        | 5.25 (4.79 - 5.73)                    | 1292.01 (1008.55 - 1637.51)                          | 44.76                                                 | 4.17                                                        | 40.70                                        |
| Turks and Caicos Islands       | -                            | -                                     | -                                                    | -                                                     | -                                                           | -                                            |
| United States                  | 12.94 (12.09 - 13.78)        | 3.63 (3.26 - 3.88)                    | 697.52 (640.68 - 759.00)                             | 26.10                                                 | 2.61                                                        | 156.90                                       |

Abbreviations: CKD, chronic kidney disease; CI: confidence interval; CKD: chronic kidney disease; DALYs: disability-adjusted life years; ISN: International Society of Nephrology  
 '-': data not available

**Table S2.** Risk factors for CKD in the ISN North America and the Caribbean region.<sup>18</sup>

| <b>Country</b>                 | <b>Obesity<br/>% (95% CI)</b> | <b>Increased BP<br/>% (95% CI)</b> | <b>Smoking<br/>% (95% CI)</b> |
|--------------------------------|-------------------------------|------------------------------------|-------------------------------|
| Antigua and Barbuda            | 19.1 (13.9 - 24.8)            | 23.4 (16.6 - 31.1)                 | 3.3 (2.5 - 4.5)               |
| Bahamas, The                   | 32.1 (26.1 - 38.5)            | 20.9 (15.1 - 27.9)                 | 6.1 (4.7 - 8.0)               |
| Barbados                       | 24.8 (19.8 - 30.2)            | 24.4 (18.0 - 31.5)                 | 4.2 (3.2 - 5.5)               |
| Canada                         | 31.3 (27.4 - 35.3)            | 13.2 (9.4 - 17.7)                  | 13.8 (12.0 - 15.9)            |
| Jamaica                        | 24.4 (19.9 - 29.2)            | 21.8 (16.0 - 28.4)                 | 9.4 (7.3 - 11.7)              |
| St. Kitts and Nevis            | 23.1 (17.7 - 29.1)            | 25.3 (18.7 - 32.4)                 | -                             |
| St. Lucia                      | 19.8 (14.9 - 25.1)            | 27.1 (20.2 - 35.0)                 | 8.0 (6.4 - 10.1)              |
| St. Vincent and the Grenadines | 23.8 (18.4 - 29.8)            | 23.3 (17.0 - 30.5)                 | 6.4 (5.0 - 8.0)               |
| Trinidad and Tobago            | 19.7 (14.5 - 25.7)            | 25.8 (18.7 - 33.9)                 | 14.6 (12.1 - 17.2)            |
| Turks and Caicos Islands       | -                             | -                                  | -                             |
| United States                  | 37.3 (33.4 - 41.3)            | 12.9 (9.8 - 16.8)                  | 13.3 (13.0 - 13.6)            |

Abbreviations: CKD, chronic kidney disease; CI: confidence interval; ISN: International Society of Nephrology; BP, blood pressure

**Figure S1.** Quality of dialysis and transplantation: Proportion of centers routinely measuring and reporting outcomes (A) and proportion of people initiating dialysis with an incremental start (B) in the ISN North America and the Caribbean region.

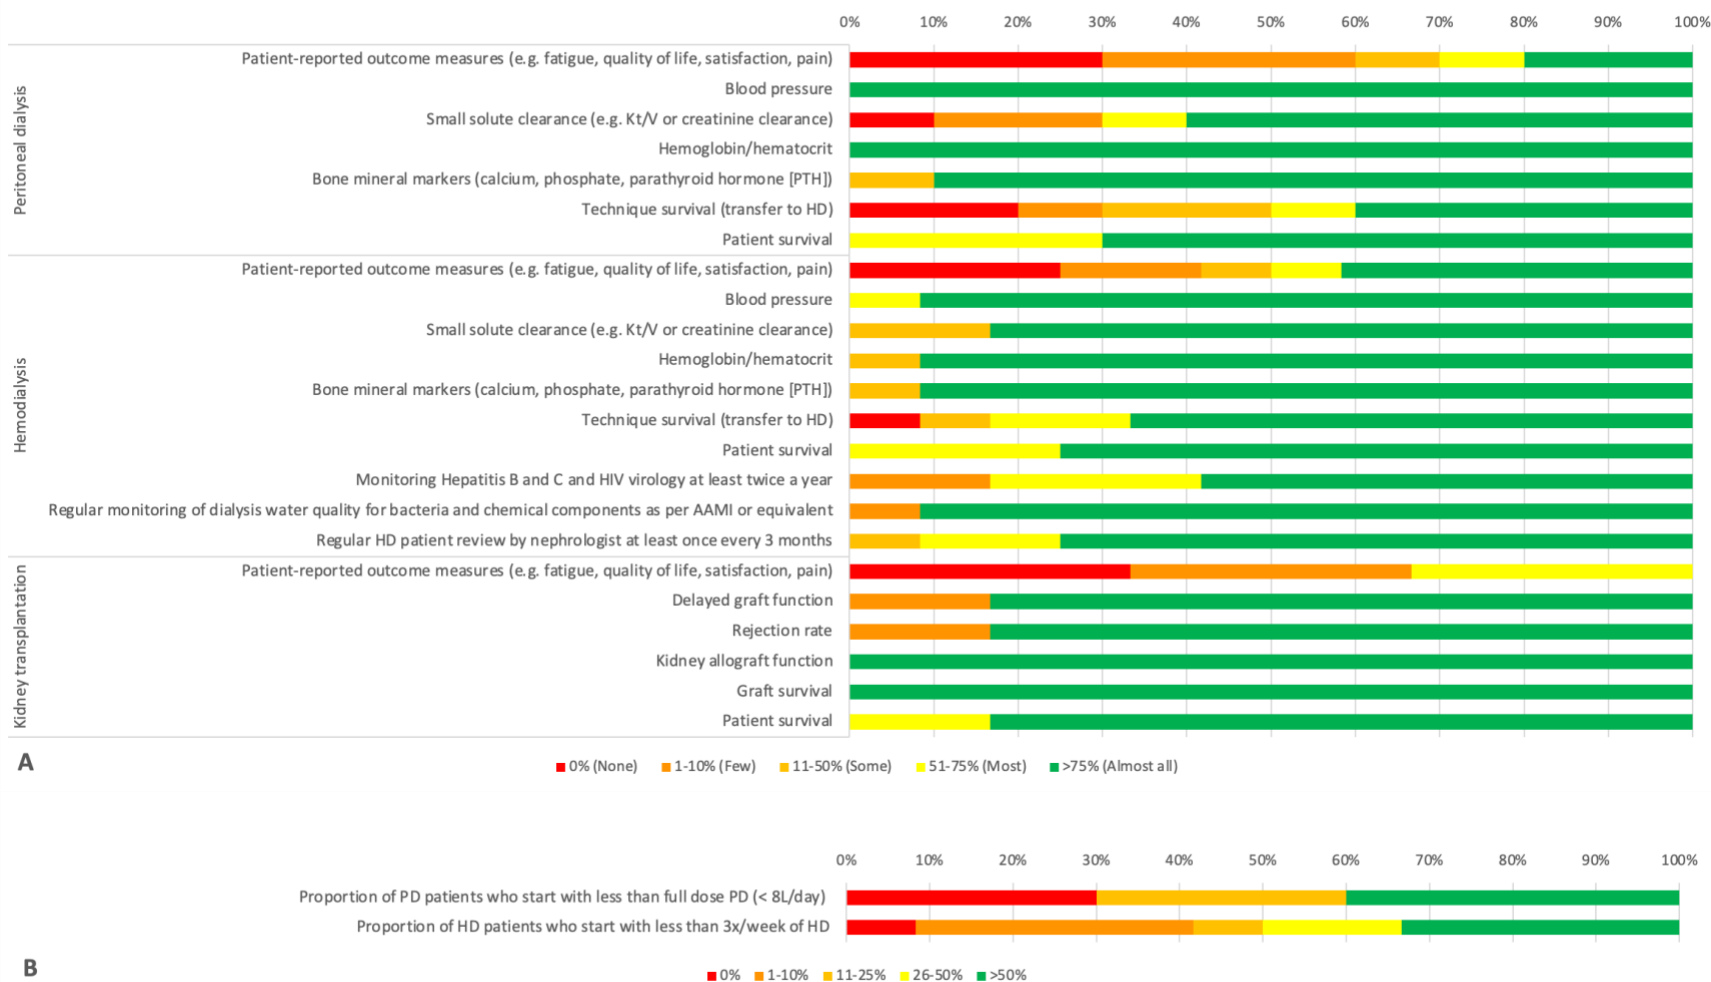

Abbreviations: ISN: International Society of Nephrology; AAMI: Association for the Advancement of Medical Instrumentation; HD: hemodialysis; PD: peritoneal dialysis; Kt/V: measure of dialysis adequacy; HIV, human immunodeficiency virus

**Figure S2.** Within-country variation in the organization, delivery and cost of kidney failure care and access to KRT in the ISN North America and the Caribbean region.

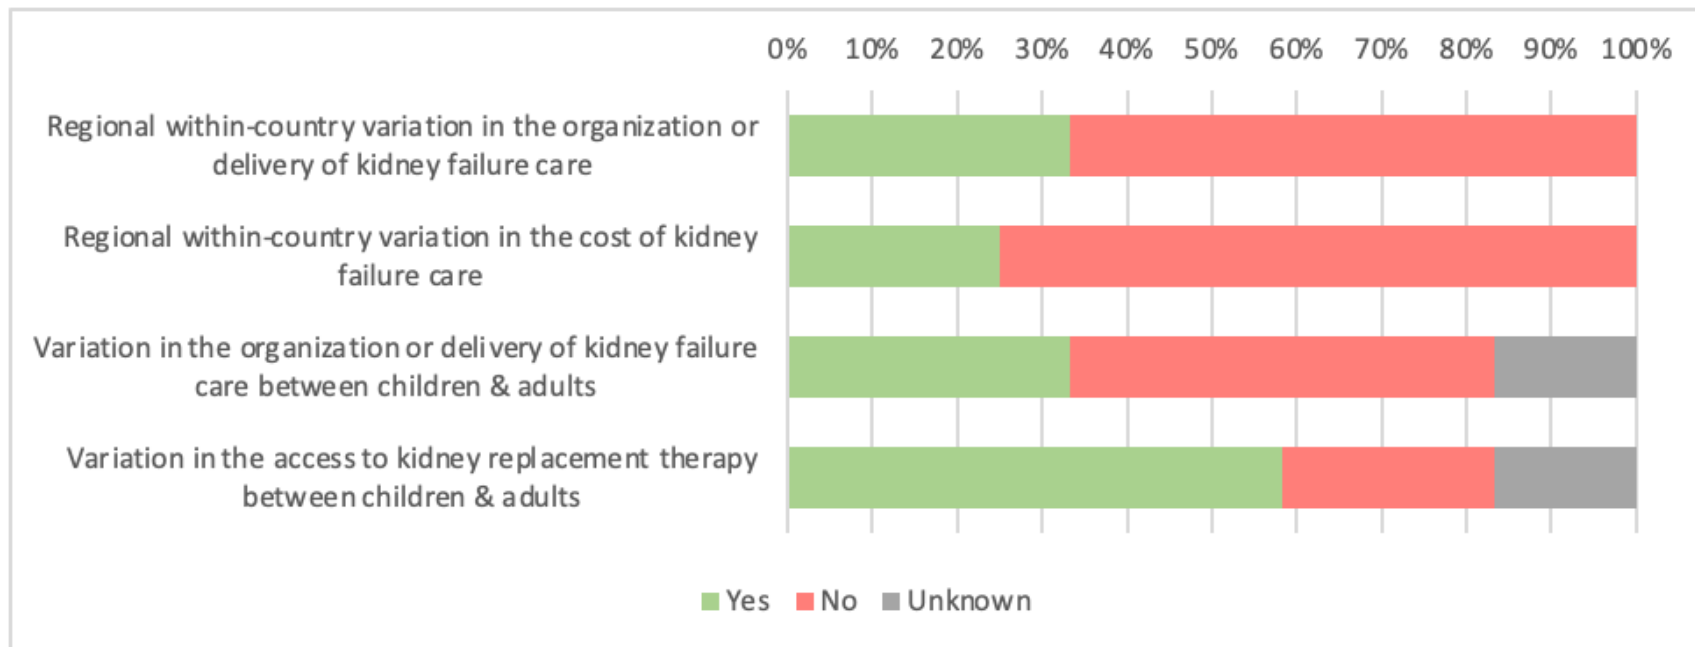

Abbreviations: ISN: International Society of Nephrology; KRT, kidney replacement therapy  
 % indicates the proportion of responding countries

**Figure S3.** Availability of services for CKD monitoring and management (proportion of countries) at the primary and secondary/tertiary care level in the ISN North America and the Caribbean region.

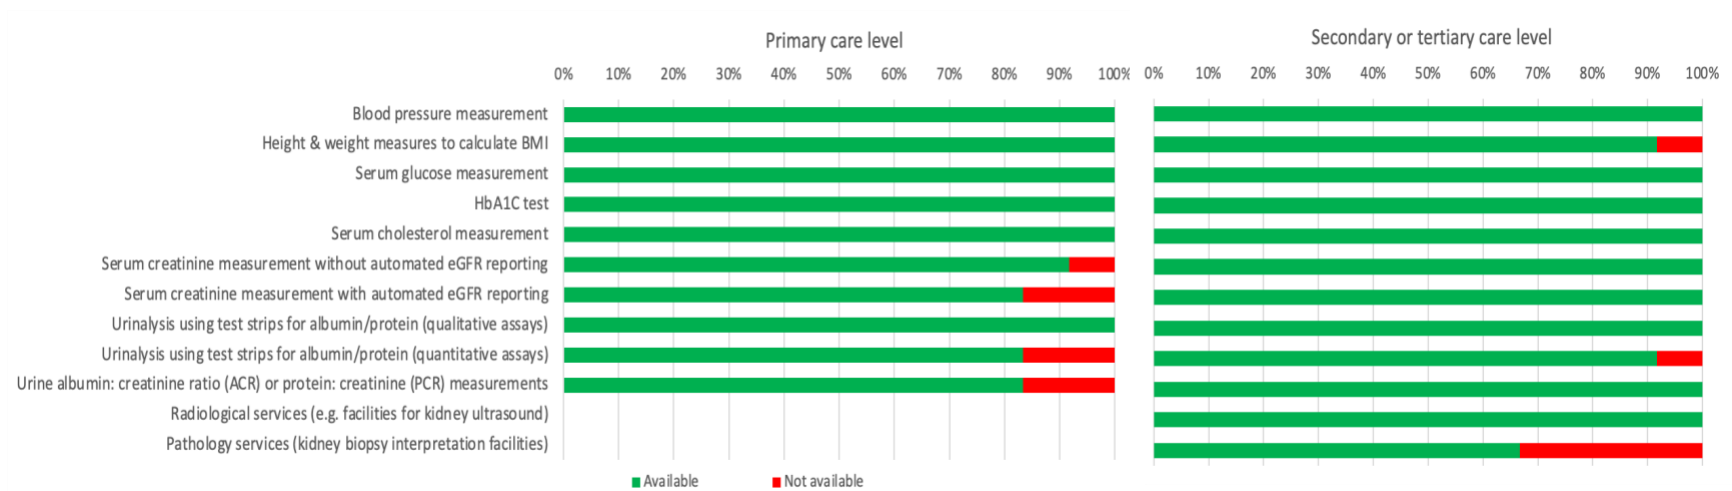

Abbreviations: ISN: International Society of Nephrology; BMI: body mass index; eGFR: estimated glomerular filtration rate; Hb, hemoglobin

**Figure S4.** Proportion of death and hospitalization in people living with kidney failure on dialysis in the first year of dialysis, globally and in the ISN North America and the Caribbean region.

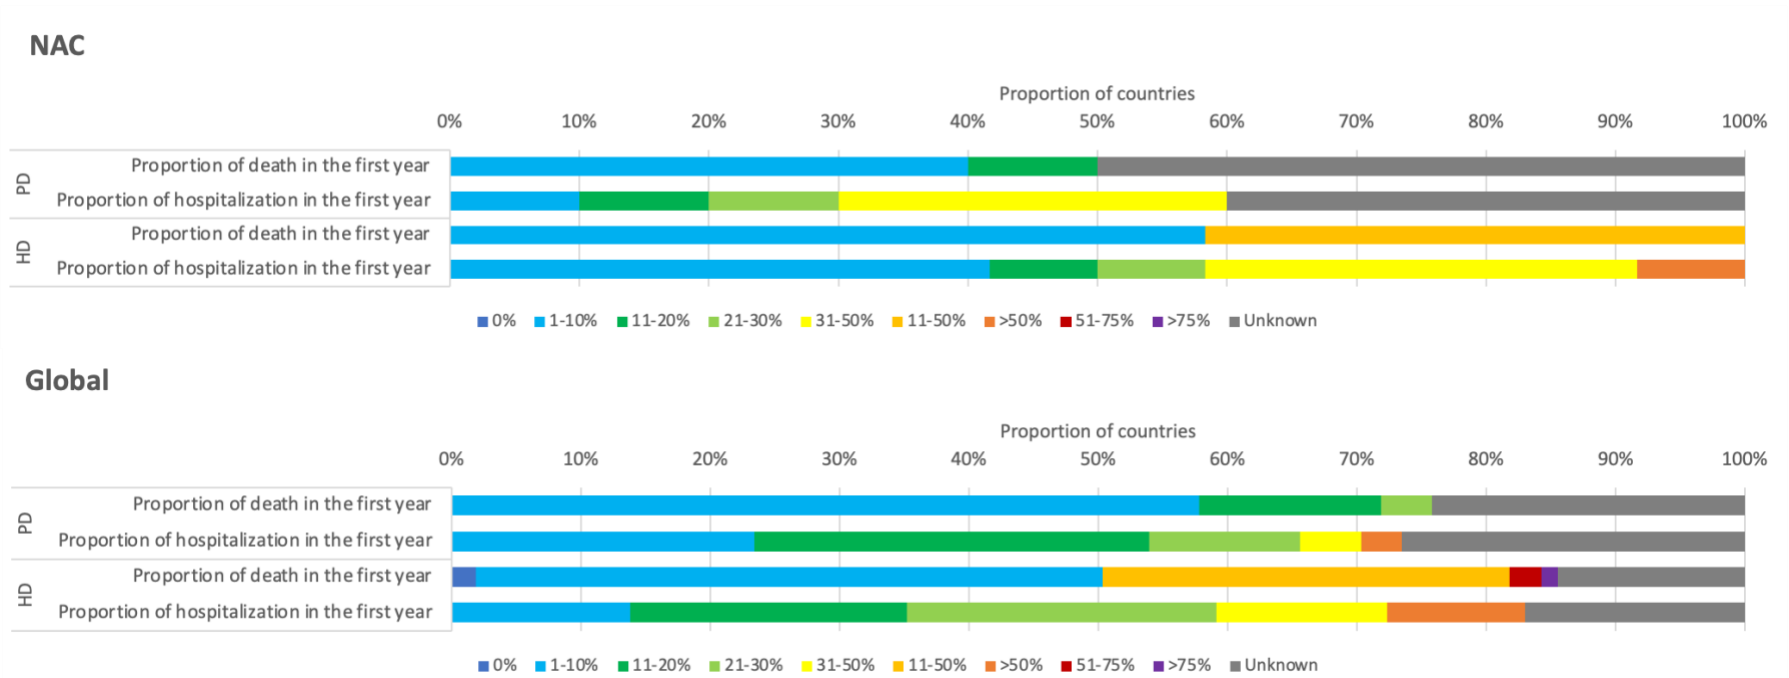

Abbreviations: ISN: International Society of Nephrology; NAC, North America and the Caribbean; HD, hemodialysis; PD, peritoneal dialysis

**Figure S5.** Availability and basis of participation of 'official' registries for conditions and treatments (proportion of countries) in the ISN North America and the Caribbean region.

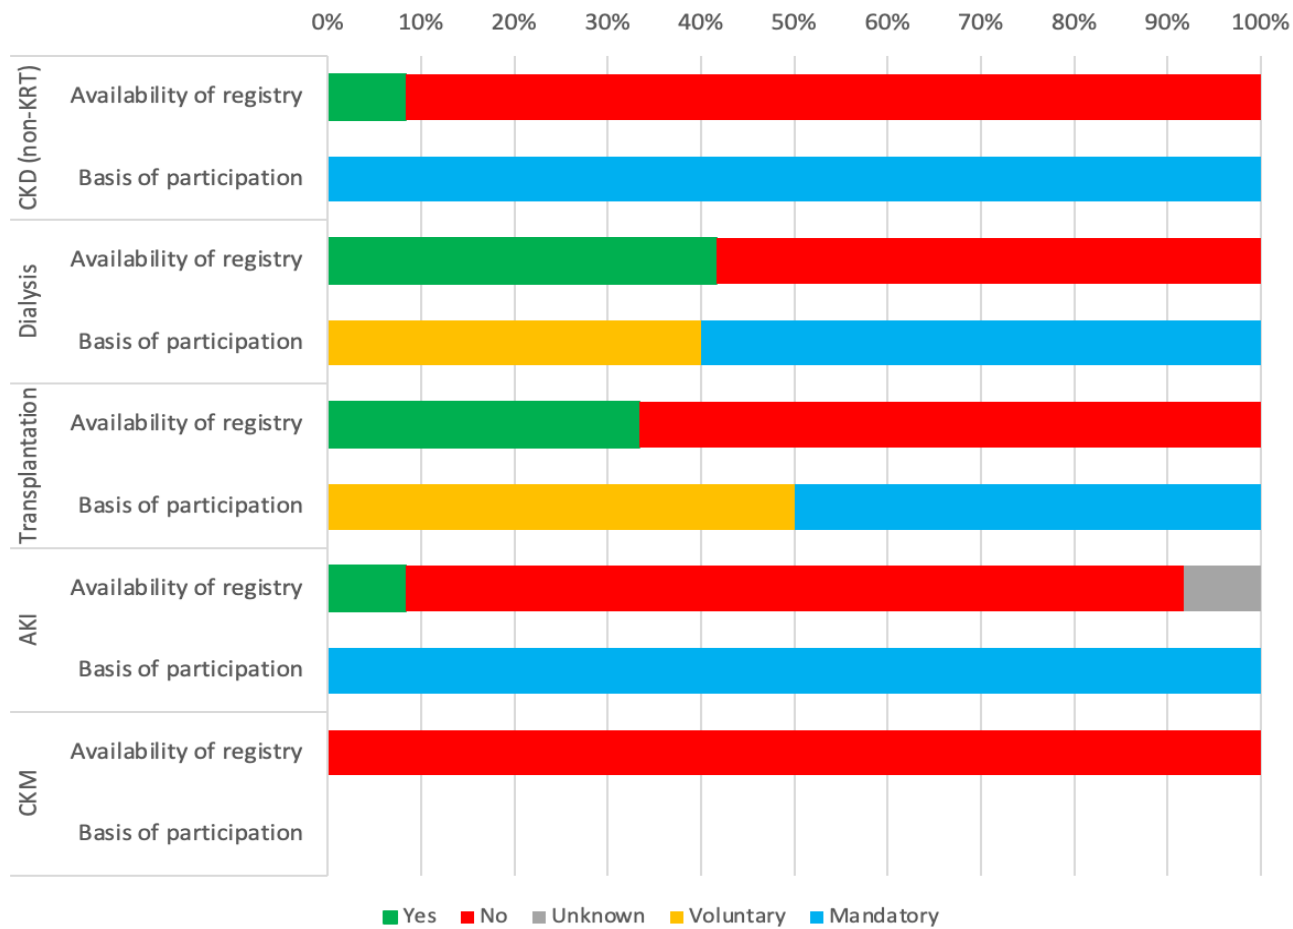

Abbreviations: ISN: International Society of Nephrology; CKM, conservative kidney management; AKI: acute kidney injury; CKD: chronic kidney disease; KRT: kidney replacement therapy.



**Figure S6.** Proportion of countries in which kidney disease is recognized as a health priority by the government in the ISN North America and the Caribbean region.

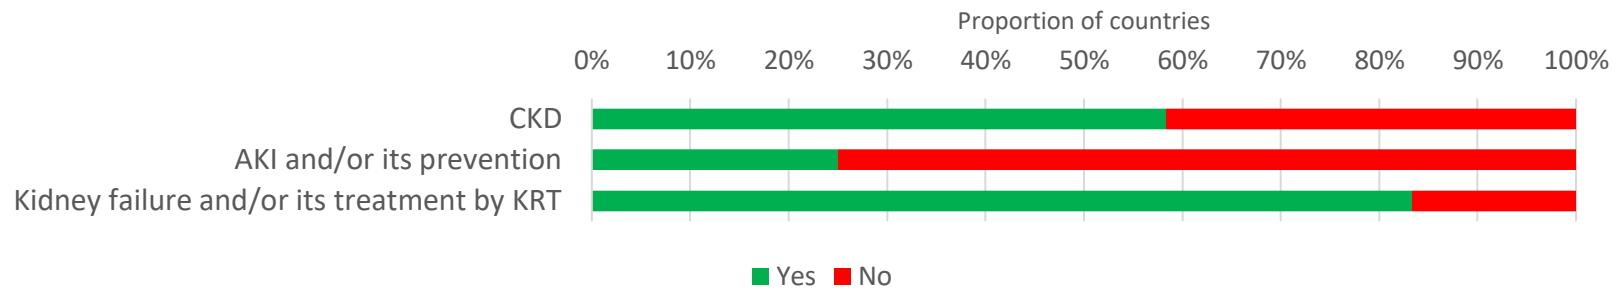

Abbreviations: ISN: International Society of Nephrology; AKI: acute kidney injury; CKD: chronic kidney disease; KRT: kidney replacement therapy.
